# Supplementary material for: Relationship Between Drug Targets and Drug-Signature Networks: A Network-Based Genome-Wide Landscape
Source: Research Square preprint supplement (doi:10.21203/rs.3.rs-967821/v1), 2021-11-18
Supplement: Supplementary file 1 [file d3d8c110fe61c17da7b3ba2e.xlsx]

## Sheet: Sheet1
Table 1.	DB table from DSgiDB
Domain	Purpose
D1	A total of 1,202 Food and Drug Administration (FDA)-approved drugs including 1,288 target genes. Here drug-target gene refers to the gene-coded proteins that physically bind and interact with drug compounds.
D2	In total, 1,220 kinase inhibitors (1,065 unique kinase inhibitors) covering 407 kinases that frequently mutate in various cancers
D3	Gene expression profiles obtained by induction with compounds. In total, 7,064 gene expression profiles were collected from three cancer cell lines perturbed by 1,309 compounds from CMap (build 02) (13). Compounds that were profiled by multiple cell lines were unified and genes with >2-fold change relative to the control (either up- or downregulation) were considered as gene sets.
D4	In total, 10,830 and 5,163 gene sets were compiled from the Therapeutics Targets Database (14) and the Comparative Toxicogenomics Database (15), respectively, which were extracted from literature using a mixture of manual curation and text mining approaches.
